# Supplementary material for: The Impact of Heat Waves on Emergency Department Admissions in Charlottesville, Virginia, U.S.A
Source: PubMed Central journal article supplement (PMC6068980; doi:10.3390/ijerph15071436), 2018-07-07
Supplement: ijerph-15-01436-s001.pdf [file ijerph-15-01436-s001.pdf]

**Table S1.** Pearson’s correlation coefficient between total admissions and admissions for the various categories over all days and during heat waves only. An asterisk indicates a statistically significant correlation at the 0.05 alpha level.

| <b>Category</b> | <b>All Days</b> | <b>Heat Waves</b> |
|-----------------|-----------------|-------------------|
| Female          | 0.83*           | 0.80*             |
| Male            | 0.79*           | 0.80*             |
| Black           | 0.61*           | 0.58*             |
| White           | 0.87*           | 0.83*             |
| Infectious      | 0.03            | 0.03              |
| Neoplasms       | 0.09*           | 0.11              |
| Endocrine       | 0.26*           | 0.22*             |
| Blood           | 0.07*           | 0.06              |
| Mental          | 0.29*           | 0.24*             |
| Nervous         | 0.33*           | 0.19*             |
| Circulatory     | 0.41*           | 0.32*             |
| Respiratory     | 0.39*           | 0.24*             |
| Digestive       | 0.35*           | 0.37*             |
| Genitourinary   | 0.37*           | 0.33*             |
| Pregnancy       | 0.16*           | -0.03             |
| Skin            | 0.27*           | 0.30*             |
| Musculoskeletal | 0.40*           | 0.43*             |
| Congenital      | 0.02            | 0.06              |
| Perinatal       | 0.02            | 0.17              |
| Ill-defined     | 0.10*           | 0.21*             |
| Injuries        | 0.37*           | 0.42*             |
| Other           | 0.35*           | 0.18*             |
| External        | -0.08*          | -0.17*            |
| Eye             | 0.08*           | 0.15*             |
| Ear             | 0.07*           | 0.15*             |
